# Supplementary material
Source: Springer Nature journal article supplement (https://www.springermedizin.de/resource/supplementary/13045_2013_355_MOESM12_ESM.pdf/9661200)

**A**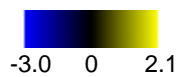

Log2 fold change

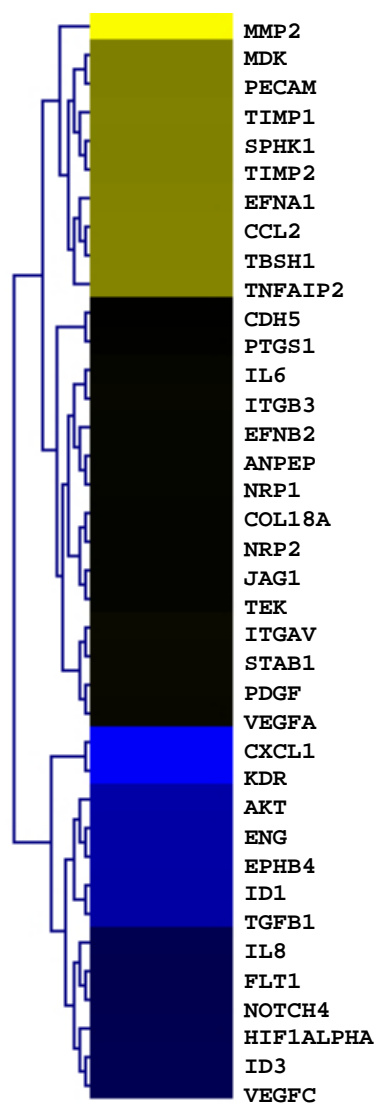**B**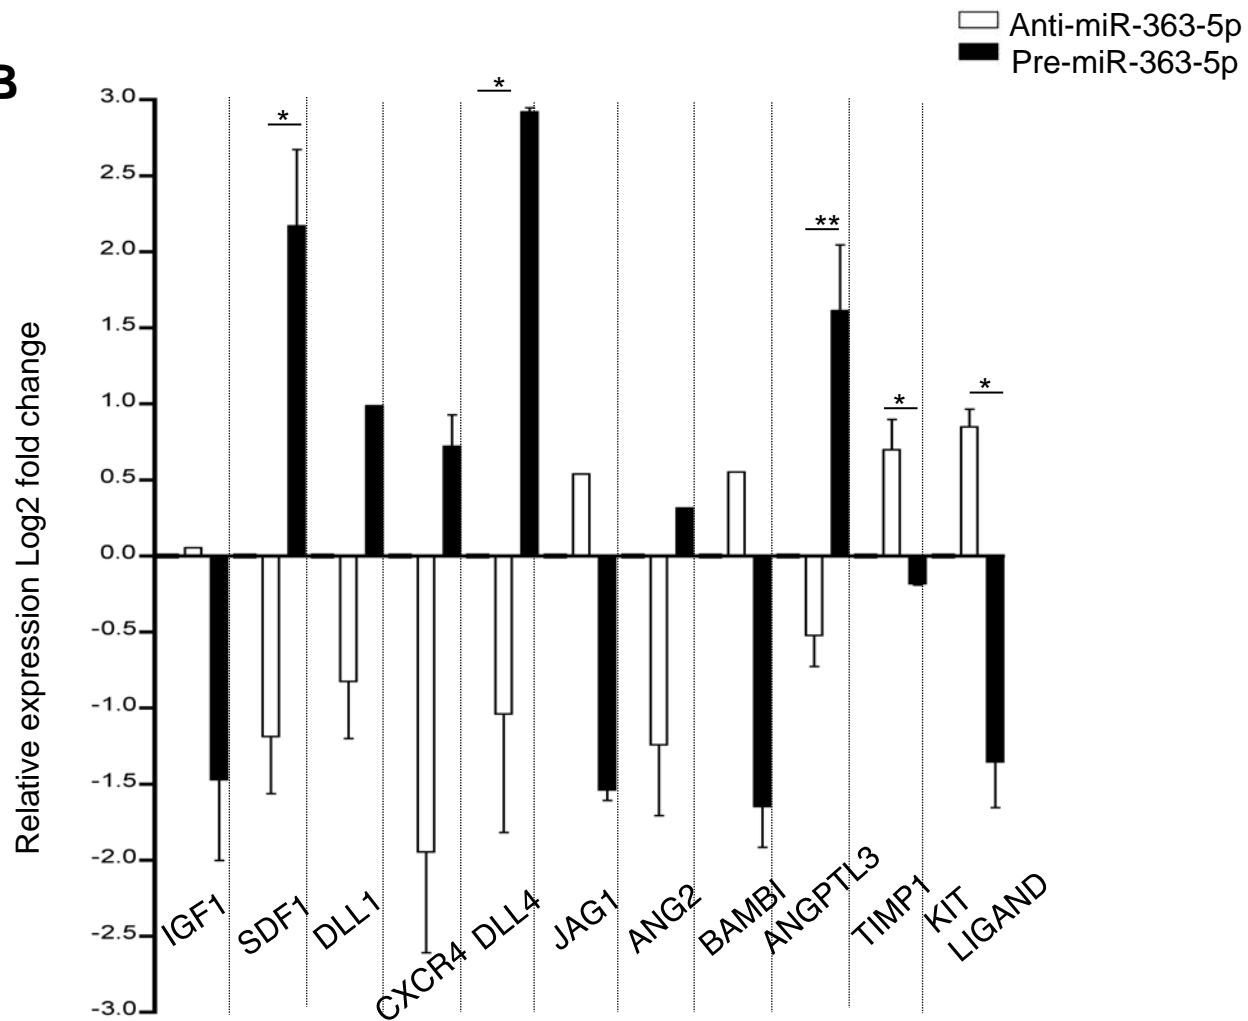

Supplement: MOESM12 [file 9661200]
